# Supplementary material for: Rapid Microwave Synthesis of Tunable Cadmium Selenide (CdSe) Quantum Dots for Optoelectronic Applications
Source: Hindawi journal article supplement (doi:10.1155/2020/5056875), 2020-01-07
Supplement: f1 [file 5056875.f1.docx]

**Supplementary Information**

Rapid Microwave Synthesis of Cadmium Selenide (CdSe) Quantum Dots for Optoelectronic Applications

*Donovan Thomas,* *,1 *Harold O. Lee III,* 1 *Marvin Pelzer,* 2 *Ayodeji Kuti,* 2 *Erin Jenrette,* 1 *and Messaoud Bahoura*1, 2

1Center for Materials Research, Norfolk State University, Norfolk, Virginia 23504, USA

2Department of Engineering, Norfolk State University, Norfolk, Virginia 23504, USA

**S1. Detailed Preparation, Synthesis, and Cleaning Procedure**

- 1. Preparation Steps

In the conventional recipe from the literature reference, two separate precursors were prepared for cadmium selenide (CdSe) quantum dot synthesis. 30 mg of selenium (Se) powder, 5 mL of 1-octadecene and 0.4 mL of tri-n-octylphosphine (TOP) are combined and heated until full dissolution is achieved. This creates a stock solution of Se- precursor. 13 mg of cadmium oxide (CdO), 0.6 mL of oleic acid and 10 mL of 1-octadecene are added to a 25-mL flask and heated to 225°C to the prepare the Cd precursor. Once the Cd precursor reaches this “hot” nucleation temperature, 1 mL of the tri-n-octylphosphine-selenium (TOP-Se) precursor solution is “injected” to begin nanocrystal formation. Aliquots, or small portions of the total final amount, can be extracted from the synthesis solution for studies. These methods can be very time consuming, as heating mantles can take time to stabilize. These methods can also be very toxic as CdO and Se are extremely corrosive materials. The same amounts of each material that were used for the conventional publication were adopted for this microwave synthesis method as well. Stock solutions of each were prepared ahead of synthesis to reduce preparation time. The amounts of chemicals for the TOP-Se precursor were scaled up by 10x to create the stock solution; requiring 300 mg of Se powder, 50 mL of 1-octadecene and 4 mL of TOP. These materials were added to a 250 mL glass bottle with a large stir bar and heated to 250°C on a hotplate until Se powder dissolution was achieved. Amounts needed for the Cd precursor were scaled up by 10x to create a stock solution; requiring 100 mL of 1-octadecene, 6 mL of oleic acid and 130 mg of CdO. These materials were added to a 250 mL glass bottle with a large stir bar and heated to 300°C (hotplate) until CdO powder fully dissolved and precursor solution changed from brown to clear. All material prep was done in a glove box. All heating was done on a hotplate outside of the glove box. Both precursor stock solutions were allowed to cool and stored back in the glove box.

- 1. Microwave Synthesis Steps

The Anton Paar G30 borosilicate glass vial with a maximum reaction volume of 20 mL was used for all samples throughout this study. In the glove box, 10.6 mL of Cd precursor and 1 mL of TOP-Se precursor was added to the reaction vial with a magnetic stir bar. A septum top with a ruby thermometer immersion tube was snapped to the top of the vial to seal the mixture of chemicals inside of the vial. The vial was then taken out of the glove box and added to the Monowave 300 microwave reactor cavity. Time and temperature recipes for specific PL wavelengths were then loaded into the Monowave software and synthesis was carried out with accurate ruby thermometer temperature monitoring.

- 1. Cleaning Steps

Resulting quantum dot colloidal solutions were transferred into the glove box and divided evenly (~2.7-2.9 mL each) into 4 centrifuge tubes. Each tube, which holds a maximum of 40 mL of liquid, was filled with excess acetone until the tube had a total of 30 mL of solution. Since CdSe is non-polar and acetone is polar, CdSe was “washed” in acetone by centrifugation [25]. Samples were taken out of the glove box and placed into a Beckman Coulter Allegra 25R Centrifuge. Each set of samples was centrifuged at 10,000 RPM for 15 minutes. Following centrifugation, CdSe clusters were stuck to the sidewalls of the centrifuge tube. A VWR Analog Vortex Mixer was used to agitate CdSe for 10 seconds each. This washing process was repeated until the acetone was as clear as possible. After acetone washing, centrifuge tubes were transferred back into the glove box. Acetone was emptied out into a waste container and removed from the glove box. Toluene was used a re-suspension solvent for CdSe quantum dots, since toluene and CdSe are both non-polar materials [26]. Therefore, CdSe quantum dots disperse into the toluene solvent creating a colloidal quantum dot suspension. 2.5 mL of toluene was added to each of the 4 centrifuge tubes, yielding a final CdSe colloidal solution amount of 10 mL for each synthesis set. The concentration of the final solution is dependent upon the amount of toluene that is used for suspension; more toluene will produce a more diluted final solution and vice versa. Centrifuge tubes containing toluene were taken out of the glove box for one final “washing.” The desktop vortex is used on the highest setting once again to initially “rip” the remaining CdSe nanocrystals from the sidewalls of the centrifuge tube. The samples were then centrifuged at 6,000 RPM for 5 minutes. Final solutions were transferred back into the glove box. Each 2.5 mL colloidal solution (from the same time/temperature synthesis set) was combined and stored in a small amber vial for characterization.

**S2. Microwave Synthesis Heating Mechanisms**

Figure S1 (left) shows the heating mechanism for conventional synthesis. Conventional synthesis methods for colloidal quantum dots in liquid experience convection heating, as heat is transferred to solutions by rapid movement of bulk molecules. Convection occurs due to a combination of advection and diffusion [1]. Advection is synonymous with convection, as it describes the transport of any substance by bulk movement. Diffusion describes the movement of a group of molecules from a highly concentrated area to an area of lower concentration. In liquids, a group of particles with a high chemical potential (high concentration) will have a desire to diffuse to areas of low chemical potential to achieve equilibrium. For conventional quantum dot synthesis, a temperature gradient is the driving force for particle diffusion, calculated by the amount of heat transferred to solution per second [2]. Therefore, heat is carried (advection) and dispersed (diffusion) through solutions during conventional synthesis. This requires an external heat source that heats the outer walls of a flask. As the glass flask heats up, temperature is transferred to the solution, creating convection currents in the solution trying to reach target temperature. Temperature is dispersed from the outside in and takes time for the core of the solution to reach target temperatures, reducing time efficiency and high throughput while increasing energy consumption. Hot surfaces during solution warm-up can also cause decomposition in localized areas.


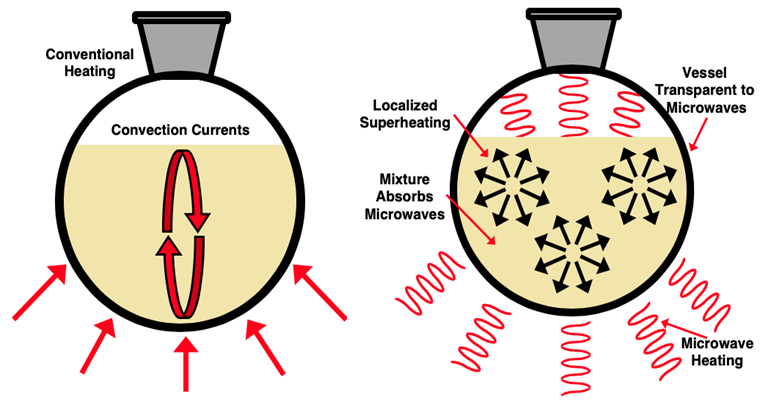


**Figure S1.** *Heating mechanism for (left) conventional synthesis and (right) microwave synthesis*

Figure S1 (right) shows the mechanism for microwave synthesis. Microwave synthesis on a large scale can be more energy efficient, as efficient conversion of electromagnetic energy to heat produces quick heating rates [3]. Microwave energy interacts with dipoles in the solution, as microwaves penetrate nearly transparent vessels to react with solution molecules [4]. The temperature of the solution increases from the core of the mixture. This quick and efficient heating method improves time efficiency and increases throughput [5]. Rapid heating rates not only slightly reduce by-products of chemicals, making high temperature synthesis less toxic; it also makes synthesis simple and highly reproducible [6].

Much like ones seen in residential homes, microwaves used for colloidal quantum dot synthesis use effective dielectric heating [7]. In this case, microwave irradiation heats the dielectric components of chemical mixtures. Dielectric materials have insulating properties; however, susceptibility allows them to be polarized by an electric field. This energy is converted into kinetic energy that provides heat. Not all materials are suitable for microwave heating, as they must possess certain dielectric properties. For colloidal quantum dot synthesis, many different solvents can be used. The most important parameter that determines if a solvent is suitable for microwave synthesis is loss tangent, which describes how well a material can convert electromagnetic radiation into heat [8]. The equation for loss tangent is:

Eq. 4 [9]

where 𝜀” describes how efficiently radiation is converted into heat and 𝜀’ describes how well a material can be polarized by an electric field. Loss tangent is a ratio of the dielectric loss to dielectric constant of a material. Materials for microwave synthesis can be classified as either having a high, medium or low loss tangent; with tan 𝛿 values greater than 0.5, between 0.5-0.1 and lower than 0.01 respectively. For efficient rapid heating by microwave synthesis, materials with high loss tangents are suitable. Some low loss tangent materials can still be used in microwave synthesis [10].

There are two well-known mechanisms for microwave synthesis, shown on the next page in Figure S2. The left image shows dipolar polarization, which is the dielectric heating method implored by the microwave instrument used in this study. Materials must have dipole properties, meaning they possess positive and negative charges separated by a distance throughout. An oscillating microwave field is generated as shown in the figure. As dipoles attempt to align with the impending oscillating field, back and forth rotation causes friction within the solution [11]. This rapid movement of dipoles leads to heat energy production from the core of the mixture. As dipoles move faster and more frequently, heat energy is increased. These positive and negative ions collide with atoms in the mixture, creating heat energy within the solution [12]. Ionic movement differs from the rotation of dipoles in dipolar polarization.


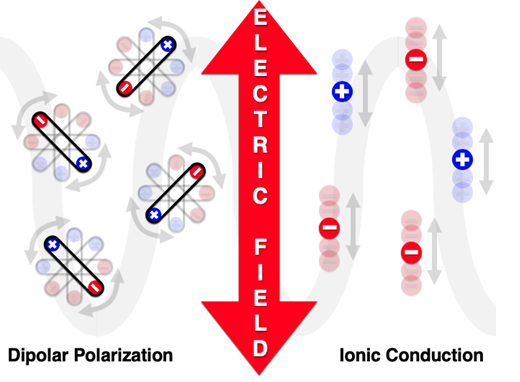


**Figure S2**. Schematic explaining ionic conduction. For this microwave heating mechanism, individually charged ions oscillate back and forth (or up and down) under the influence of the electric field. (Left) Dipolar polarization and (Right) Ionic conduction microwave synthesis heating mechanisms.

**S3. Nanocrystal Formation**

Nanocrystal formation in microwave synthesis will occur if the chemical potential of the mixture ensures thermodynamic stability of the smallest quantum dots that can be formed by respective precursor materials [13]. This allows nanocrystals to increase in size gradually as time and temperature increases. Figure S3 on the next page shows the most common size control mechanism for colloidal inorganic quantum dot synthesis by microwave irradiation [14]. Most microwave syntheses undergo a one-pot, single step reaction where all materials are co-mixed and heated to a target temperature. Maximum final quantum dot size can be dictated by the amount of precursors and ligands used in each mixture, allowing the production of reproducible recipes for quantum dots of specific diameter [15].


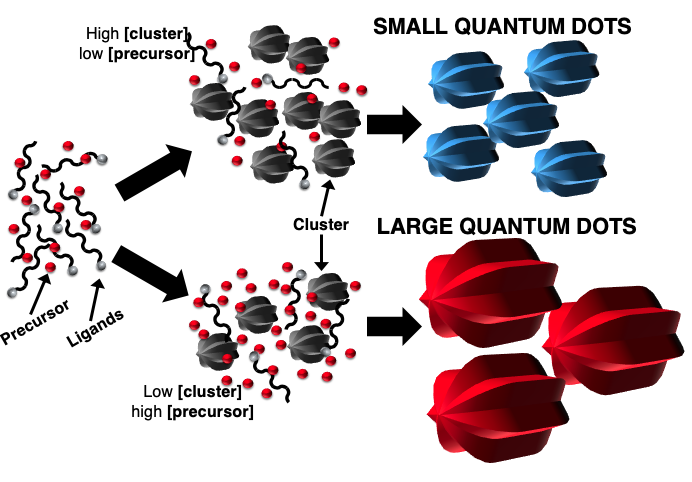


***Figure S3.*** *Most common size control mechanism of colloidal quantum dots by microwave synthesis.*

The higher the ratio of QD cluster concentration (over time) to leftover precursor, the smaller final QDs will be. The lower the ratio of QD clusters to leftover precursor, the larger final QDs will be [16]. This can be governed with control of time and temperature. Microwave synthesis recipes can be specifically tuned, as heating to target temperatures and synthesis hold times can be controlled. Nucleation temperature can be adjusted to specific nanocrystal materials. This allows for reaction time control, although, not as quick and precise as conventional methods; being one of the few disadvantages of microwave synthesis. Control of these reaction times and processes dictate final quantum dot size. Fast reactions that quickly reach the nucleation target temperature leave little time for QD clusters to form in high concentrations. These fast and high temperature reactions leave higher amounts of precursor to feed the few QD cluster “seeds;” leading to larger quantum dots. Slower reactions with longer hold times allow for more QD seed clusters to form over time, leaving less precursor concentration and leading to smaller final quantum dot diameters [17]. At longer synthesis times, an undesirable growth effect known as Ostwald’s Ripening may begin to take effect [18]. A quantum dot critical size (minimum size that can be synthesized) for each recipe is also governed by amounts of precursors and ligands [19]. Longer synthesis times will dissolve forming QD clusters that are smaller than the minimum critical size, leading to more precursor concentration [20]. This higher precursor concentration has an effect on some of the other QD clusters in solution, causing them to increase in size [21]. This Ostwald Ripening effect inhibits mono- dispersion of smaller quantum dots, as the QD clusters effected by the increase in precursor concentration will grow in size; creating a blend of quantum dots with different diameters [22].


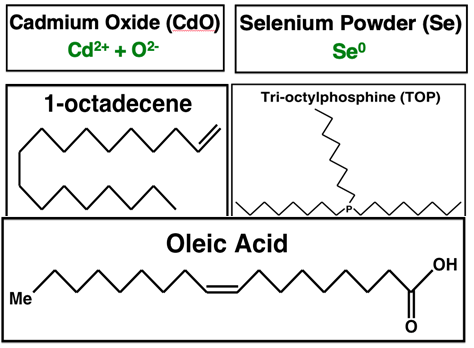


**Figure S4.** Chemicals used for CdSe quantum dot synthesis.

Cadmium selenide (CdSe) QD’s in this study are synthesized with a surfactant-assisted growth mechanism during microwave heating [23]. Respective ion sources provide cadmium and selenium to the system. Oleic acid is a natural surfactant and is used as the surface ligand to prevent individual quantum dots from aggregation (grouping together) during synthesis. This also protects the surface from oxidation or possible defects that have negative effects on nanocrystal quantum yield and properties [24].


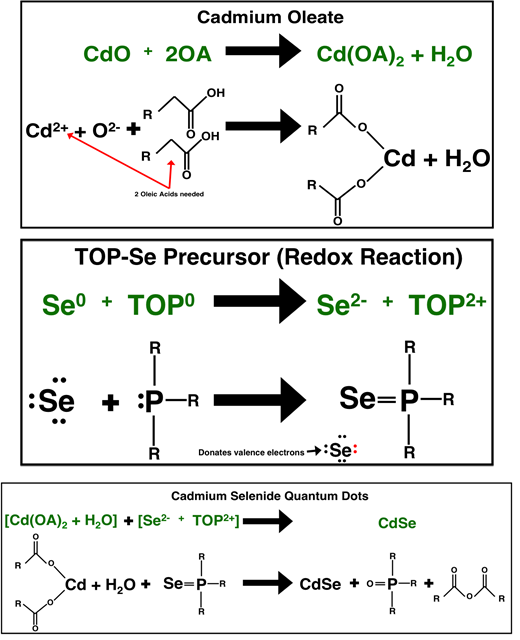


***Figure S5.*** *Cd-oleate precursor reaction, TOP-Se precursor reaction and final CdSe QD reaction [29].*

Octadecene is a non-coordinating solvent that is suitable for high temperature synthesis. Octadecene makes up most of the one-pot mixture as the majority solvent. Tri-octylphosphine (TOP) is the main reaction coordinating solvent and enhances passivation of the quantum dot surface [25]. TOP, or any other coordinating solvent, is used to govern the shape and structure of resulting quantum dots [26]. 1-octadecene is the non-polar majority solvent and does not participate in the reaction. The surface ligand, oleic acid, has a polar and non-polar end. The non-polar end of oleic acid dissolves in octadecene. As the ratio of oleic acid in octadecene is reduced, the growth rate of CdSe quantum dots decreases and size distribution becomes narrow [27]. Metal ions are introduced using cadmium oxide (CdO) and pure selenium (Se) powder. A cadmium oleate precursor is made by combining CdO, oleic acid and octadecene in a vial. Oleic acid is responsible for dissolving CdO (Cd 2+ + O2-) [28]. In order for Se0 to react with Cd2+ for final CdSe nanocrystals, selenium must be reduced to Se2-. Therefore, a selenium precursor is made by combining tri-octylphosphine (TOP), octadecene and selenium powder. The phosphorus atom in TOP contains 5 valence electrons, 3 of which are occupied. The 2 free valence electrons in phosphorus are donated to selenium through a redox reaction, making it Se2- [30]. Cd-oleate and TOP-Se precursors are then combined to create CdSe nanocrystals (thermolysis reaction) [31]. The methods discussed in the background section of this chapter were implored and results are presented. The purpose of in-house CdSe synthesis was the need of various size QD’s with different band gaps for device implementation.

**REFERENCES**

1. Tsakalakos, T., editor. *Nanostructures: Synthesis, Functional Properties and Application*. Kluwer Academic, 2003
2. Mullins, W., editor. *Synthesis and Processing of Nanostructured Materials*. John Wiley & Sons, 2007
3. Kappe, C. *Practical Microwave Synthesis for Organic Chemists*. Wiley VCH, 2009
4. Tierney, J., editor. *Microwave Assisted Organic Synthesis*. Blackwell / CRC Press, 2005
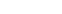

5. Seeberger, P., editor. *New Avenues to Efficient Chemical Synthesis: Emerging Technologies*. Springer, 2007
6. Polshettiwar, V. "8: Environmentally Benign Chemical Synthesis via Microwave Irradiation." *Eco-friendly Synthesis of Fine Chemicals*, edited by R. Ballini, Royal Society of Chemistry, 2009
7. Zhu, J. *Quantum Dots for DNA Biosensing*. Springer, 2013
8. Leadbeater, N., editor. *Microwave Heating as a Tool for Sustainable Chemistry*. CRC Press, 2010
9. Bogdal, D. *Microwave-assisted Organic Synthesis: One Hundred Reaction Procedures*. Elsevier, 2005
10. Loupy, A. *Microwaves in organic synthesis*. Wiley-VCH, 2002
11. Ameta, S., editor. *Green Chemistry: Fundamentals and Applications*. Apple Academic / CRC Press, 2013
12. Dicks, A., editor. *Green Organic Chemistry in Lecture and Laboratory*. CRC Press, 2012
13. Hu, M. "Semiconductor Nanocrystal Quantum Dot Synthesis Approaches Towards Large- Scale Industrial Production for Energy Applications." *Nanoscale Research Letters*, vol. 10, no. 469, Dec. 2015
14. Cozzoli, P., and C. Kappe. "Microwave-Assisted Synthesis of Colloidal Inorganic Nanocrystals." *Applied Chemistry International*, vol. 50, 2011
15. Hyeon, T. "Synthesis of Monodisperse Spherical Nanocrystals." *Applied Chemistry International*, vol. 46, 2007
16. Chikan, V. "Rapid Nanoparticle Synthesis by Magnetic and Microwave Heating." *Nanomaterials*, vol. 85, May 2016
17. Cozzoli, P. "14: Synthetic strategies to multi- material hybrid nanocrystals." *Advanced Wet- Chemical Synthetic Approaches to Inorganic Nanostructures*, edited by Cozzoli, Transworld Research Network, 2008
18. Ostwald, W. "Studies on the formation and transformation of solid bodies.” *Journal of Physical Chemistry*, vol. 22, no. 1, Feb. 1897
19. Jacak, L. *Quantum Dots*. Springer, 1998
20. Rogach, A., editor. *Semiconductor Nanocrystal Quantum Dots: Synthesis, Assembly, Spectroscopy and Applications*. Springer, 2008
21. Unlu, H., editor. *Low Dimensional Semiconductor Structures: Characterization, Modeling and Application*. Springer, 2012
22. Schmid, G., editor. *Nanoparticles: From Theory to Application*. Wiley-VCH, 2011
23. Xia, Y. "Shape-controlled synthesis of metal nanocrystals: simple chemistry meets complex physics?" *Applied Chemistry International*, 2009
24. Green, M. "The nature of quantum dot capping ligands." *Journal of Materials Chemistry*, no. 28, Apr. 2010
25. Mazing, D. "Preparation of cadmium selenide colloidal quantum dots in non-coordinating solvent octadecene." *Journal of Physics: Conference Series*, no. 661, 2015
26. Peng, X. "Shape control of CdSe nanocrystals." *Nature*, vol. 404, Mar. 2000
27. Bullen, C. "Nucleation and Growth Kinetics of CdSe Nanocrystals in Octadecene." *ACS Nanoletters*, vol. 4, no. 12, Nov. 2004
28. Peng, Z. "Formation of High-Quality CdTe, CdSe, and CdS Nanocrystals Using CdO as Precursor." *American Chemical Society*, vol. 123, no. 1, Dec. 2000
29. Mazzio, K. "A one pot organic/CdSe nanoparticle hybrid material synthesis with in situ π- conjugated ligand functionalization." *Chemical Communications*, no. 13, Dec. 2012
30. Tsui, E. "Selenium Redox Reactivity on Colloidal CdSe Quantum Dot Surfaces." *American Chemical Society*, vol. 138, no. 35, Aug. 2016
31. Zhu, M. "Microwave-Mediated Nonaqueous Synthesis of Quantum Dots at Moderate Temperature." *Lanmuir*, vol. 25, no. 17, June 2009
